# Supplementary material
Source: PubMed Central journal article supplement (PMC5425666)
Supplement: 12551_2009_9_MOESM1_ESM.pdf [file 12551_2009_9_MOESM1_ESM.pdf]

- Bakolitsa C, Cohen DM, Bankston LA, Bobkov AA, Cadwell GW, Jennings L, Critchley DR, Craig SW, Liddington RC (2004) Structural basis for vinculin activation at sites of cell adhesion. *Nature* 430:583-586
- Barsukov IL, Prescott A, Bate N, Patel B, Floyd DN, Bhanji N, Bagshaw CR, Letinic K, Di Paolo G, De Camilli P, Roberts GCK, Critchley DR (2003) Phosphatidylinositol phosphate kinase type 1 $\gamma$  and  $\beta$ 1-Integrin cytoplasmic domain bind to the same region in the talin FERM domain. *J Biol Chem* 278:31202-31209
- Bass MD, Patel B, Barsukov IG, Fillingham IJ, Mason R, Smith BJ, Bagshaw CR, Critchley DR (2002) Further characterization of the interaction between the cytoskeletal proteins talin and vinculin. *Biochem J* 362:761-768
- Bass MD, Smith BJ, Prigent SA, Critchley DR (1999) Talin contains three similar vinculin-binding sites predicted to form an amphipathic helix. *Biochem J* 341:257-263
- Borgon RA, Vonrhein C, Bricogne G, Bois PR, Izard T (2004) Crystal structure of human vinculin. *Structure* 12:1189-97
- Borowsky ML, Hynes RO (1998) Layilin, a novel talin-binding transmembrane protein homologous with C-type lectins, is localized in membrane ruffles. *J Cell Biol* 143:429-442
- Bouaouina M, Lad Y, Calderwood DA (2008) The N-terminal domains of talin cooperate with the phosphotyrosine binding-like domain to activate  $\beta$ 1 and  $\beta$ 3 integrins. *J Biol Chem* 283:6118-6125
- Brett TJ, Legendre-Guillemain V, McPherson PS, Fremont DH (2006) Structural definition of the F-actin-binding THATCH domain from HIP1R. *Nature Struct Mol Biol* 13:121-130
- Calderwood DA (2004) Integrin activation. *J Cell Sci* 117:657-666
- Calderwood DA, Yan BX, de Pereda JM, Alvarez BG, Fujioka Y, Liddington RC, Ginsberg MH (2002) The phosphotyrosine binding-like domain of talin activates integrins. *J Biol Chem* 277:21749-21758
- Campbell ID, Ginsberg MH (2004) The talin-tail interaction places integrin activation on FERM ground. *Trends Biochem Sci* 29:429-435
- Cheung TYS, Fairchild, M.J., Zarivach, R., Tanentzapf, G., van Petegem, F. (2009) Crystal structure of the talin integrin binding domain 2. *J Mol Biol* *in press* 10.1016/j.jmb.2009.01.053
- Cluzel C, Saltel F, Lussi J, Paulhe F, Imhof BA, Wehrle-Haller B (2005) The mechanisms and dynamics of  $\alpha$ V $\beta$ 3 integrin clustering in living cells. *J Cell Biol* 171:383-392
- Cohen DM, Chen H, Johnson RP, Choudhury B, Craig SW (2005) Two distinct head-tail interfaces cooperate to suppress activation of vinculin by talin. *J Biol Chem* 280:17109-17117
- \*\*Critchley DR (2009) Biochemical and structural properties of the integrin-associated cytoskeletal protein talin. *Ann Rev Biophys* 38 *in press* 10.1146/annurev.biophys.050708.133744  
*Wide-ranging review of current knowledge of talin in a biochemical and cellular context.*
- Critchley DR, Gingras AR (2008) Talin at a glance. *J Cell Sci* 121:1345-1347
- de Pereda JM, Wegener KL, Santelli E, Bate N, Ginsberg MH, Critchley DR, Campbell ID, Liddington RC (2005) Structural basis for phosphatidylinositol phosphate kinase type I $\gamma$  binding to talin at focal adhesions. *J Biol Chem* 280:8381-8386
- \*\*del Rio A, Perez-Jimenez R, Liu RC, Roca-Cusachs P, Fernandez JM, Sheetz MP (2009) Stretching single talin rod molecules activates vinculin binding. *Science* 323:638-641  
*Outstanding single-molecule study providing the first experimental evidence for activation of vinculin binding sites in talin by mechanical stretch.*
- Di Paolo G, Pellegrini L, Letinic K, Cestra G, Zoncu R, Voronov S, Chang S, Guo J, Wenk MR, De Camilli P (2002) Recruitment and regulation of phosphatidylinositol phosphate kinase type 1 $\gamma$  by the FERM domain of talin. *Nature* 420:85-9

- Dietrich C, Goldmann, W.H., Sackmann, E., Isenberg, G. (1993) Interaction of NBD-talin with lipid monolayers - a film balance study. *FEBS Lett* 324:37-40
- Dyson HJ, Wright, PE (2005) Intrinsically unstructured proteins and their functions. *Nature Rev Mol Cell Biol* 6:197-208
- Fillingham I, Gingras AR, Papagrigoriou E, Patel B, Emsley J, Critchley DR, Roberts GC, Barsukov IL (2005) A vinculin binding domain from the talin rod unfolds to form a complex with the vinculin head. *Structure* 13:65-74
- Galbraith CG, Yamada KM, Sheetz MP (2002) The relationship between force and focal complex development. *J Cell Biol* 159:695-705
- \*Garcia-Alvarez B, de Pereda JM, Calderwood DA, Ulmer TS, Critchley D, Campbell ID, Ginsberg MH, Liddington RC (2003) Structural determinants of integrin recognition by talin. *Mol Cell* 11:49-58  
*Describes the crystal structure of the talin F2F3 FERM domain and provides insights into how the F3 FERM domain interacts with the NPxY motif in the cytoplasmic tails of  $\beta$ -integrins.*
- Gilmore AP, Burridge K (1996) Regulation of vinculin binding to talin and actin by phosphatidylinositol-4,5-bisphosphate. *Nature* 381:531-535
- Gingras AR, Bate N, Goult BT, Hazelwood L, Canestrelli I, Grossmann JG, Liu H, Putz NSM, Roberts GCK, Volkmann N, Hanein D, Barsukov IL, Critchley DR (2008) The structure of the C-terminal actin-binding domain of talin. *EMBO J* 27:458-469
- \*\*Gingras AR, Vogel KP, Steinhoff HJ, Ziegler WH, Patel B, Emsley J, Critchley DR, Roberts GCK, Barsukov IL (2006) Structural and dynamic characterization of a vinculin binding site in the talin rod. *Biochemistry* 45:1805-1817  
*Spectroscopic (EPR and NMR) evidence for unfolding of a helical bundle containing a vinculin binding site on addition of vinculin*
- \*\*Gingras AR, Ziegler WH, Frank R, Barsukov IL, Roberts GCK, Critchley DR, Emsley J (2005) Mapping and consensus sequence identification for multiple vinculin binding sites within the talin rod. *J Biol Chem* 280:37217-37224  
*The vinculin binding sites in the talin rod were mapped using synthetic peptides, and the key residues required to support vinculin binding identified.*
- Gingras AR, Ziegler, WH, Bobkov, AA, Joyce, MG, Fasci, D, Himmel, M, Rothemund, S, Ritter, A, Grossmann, JG, Patel, B, Bate, N, Goult, BT, Emsley, J, Barsukov, IL, Roberts, GCK, Liddington, RC, Ginsberg, MH, Critchley, DR.(2009) Structural determinants of integrin-binding to the talin rod. *J Biol Chem in press* 10.1074/jbc.M805937200
- \*\*Goksoy E, Ma YQ, Wang XX, Kong XM, Perera D, Plow EF, Qin J (2008) Structural basis for the autoinhibition of talin in regulating integrin activation. *Mol Cell* 31:124-133  
*Provides the first structural insights into the 'autoinhibition' of talin through a 'head-tail' interaction, and how this masks the integrin binding site in the talin F3 FERM domain.*
- Goldmann WH, Senger R, Kaufmann S, Isenberg G (1995) Determination of the affinity of talin and vinculin to charged lipid vesicles: a light scattering study. *FEBS Lett* 368:516-518
- \*\*Goult BT, Bate, N, Anthis, NJ, Wegener, KL, Gingras, AR, Patel, B, Barsukov, IL, Campbell, ID, Roberts, GCK, and Critchley, DR (2009) The structure of an interdomain complex which regulates talin activity. *J Biol Chem in press*. doi:10.1074/jbc.M900078200  
*The NMR structure of a complex between the talin F3 FERM domain and a 5-helix bundle in the talin rod shows how the integrin binding site in F3 is masked*
- Han JW, Lim CJ, Watanabe N, Soriani A, Ratnikov B, Calderwood DA, Puzon-McLaughlin W, Lafuente EM, Boussiotis VA, Shattil SJ, Ginsberg MH (2006) Reconstructing and deconstructing agonist-induced activation of integrin  $\alpha$ IIb $\beta$ 3. *Curr Biol* 16:1796-1806

- Harburger DS, Calderwood DA (2009) Integrin signalling at a glance. *J Cell Sci* 122:159-163
- Hemmings L, Rees DJG, Ohanian V, Bolton SJ, Gilmore AP, Patel B, Priddle H, Trevithick JE, Hynes RO, Critchley DR (1996) Talin contains three actin-binding sites each of which is adjacent to a vinculin-binding site. *J Cell Sci* 109:2715-2726
- Hynes RO (2002) Integrins: Bidirectional, allosteric signaling machines. *Cell* 110:673-687
- \*Hytonen VP, Vogel V (2008) How force might activate talin's vinculin binding sites: SMD reveals a structural mechanism. *PLOS Computational Biology* 4 10.1371/journal.pcbi.0040024  
*Molecular dynamic simulations indicate possible structural changes produced by mechanical stretch of a talin helical bundle.*
- Izard T, Evans G, Borgon RA, Rush CL, Bricogne G, Bois PRJ (2004) Vinculin activation by talin through helical bundle conversion. *Nature* 427:171-175
- Jiang GY, Giannone G, Critchley DR, Fukumoto E, Sheetz MP (2003) Two-piconewton slip bond between fibronectin and the cytoskeleton depends on talin. *Nature* 424:334-337
- Johnson RP, Craig SW (1995) F-actin binding site masked by the intramolecular association of vinculin head and tail domains. *Nature* 373:261-264
- Johnson RP, Craig SW (1994) An intramolecular association between the head and tail domains of vinculin modulates talin binding. *J Biol Chem* 269:12611-12619
- Johnson RP, Craig SW (1995) The carboxy-terminal tail domain of vinculin contains a cryptic binding site for acidic phospholipids. *Biochem Biophys Res Commun* 210:159-164
- Larjava H, Plow EF, Wu C (2008) Kindlins: essential regulators of integrin signalling and cell-matrix adhesion. *EMBO Rep* 9:1203-1208
- Lee HS, Bellin RM, Walker DL, Patel B, Powers P, Liu HJ, Garcia-Alvarez B, de Pereda JM, Liddington RC, Volkman N, Hanein D, Critchley DR, Robson RM (2004) Characterization of an actin-binding site within the talin FERM domain. *J Mol Biol* 343:771-784
- Lee HS, Lim, CJ, Puzon-McLaughlin, W, Shattil, SJ, Ginsberg, MH (2009) RIAM activates integrins by linking talin to Ras GTPase membrane-targeting sequences. *J Biol Chem* 284:5119-5127
- Legate KR, Fassler R (2009) Mechanisms that regulate adaptor binding to  $\beta$ -integrin cytoplasmic tails. *J Cell Sci* 122:187-198
- Ling K, Doughman RL, Firestone AJ, Bunce MW, Anderson RA (2002) Type I $\gamma$  phosphatidylinositol phosphate kinase targets and regulates focal adhesions. *Nature* 420:89-93
- Ling K, Doughman RL, Iyer VV, Firestone AJ, Bairstow SF, Mosher DF, Schaller MD, Anderson RA (2003) Tyrosine phosphorylation of type I $\gamma$  phosphatidylinositol phosphate kinase by Src regulates an integrin-talin switch. *J Cell Biol* 163:1339-1349
- Martel V, Racaud-Sultan C, Dupe S, Marie C, Paulhe F, Galmiche A, Block MR, Albiges-Rizo C (2001) Conformation, localization, and integrin binding of talin depend on its interaction with phosphoinositides. *J Biol Chem* 276:21217-21227
- McCann RO, Craig SW (1997) The I/LWEQ module: A conserved sequence that signifies F-actin binding in functionally diverse proteins from yeast to mammals. *Proc Natl Acad Sci USA* 94:5679-5684
- Moes M, Rodius S, Coleman SJ, Monkley SJ, Goormaghtigh E, Tremuth L, Kox C, van der Holst PPG, Critchley DR, Kieffer N (2007) The integrin binding site 2 (IBS2) in the talin rod domain is essential for linking integrin beta subunits to the cytoskeleton. *J Biol Chem* 282:17280-17288
- \*Molony L, McCaslin, D, Abernethy, J, Paschal, B, Burridge, K (1987) Properties of talin from chicken gizzard smooth muscle. *J Biol Chem* 262:7790-7795  
*Provides the first evidence, based on sedimentation velocity and equilibrium together with*

*rotary shadowing electron microscopy, that talin can exist in both a globular and extended form dependent on a head-tail interaction.*

- Monkley SJ, Pritchard CA, Critchley DR (2001) Analysis of the mammalian talin2 gene TLN2. *Biochem Biophys Res Commun* 286:880-885
- Niggli V, Kaufmann, S, Goldmann, WH, Weber, T, Isenberg, G (1994) Identification of functional domains in the cytoskeletal protein talin. *Eur J Biochem* 224:951-957
- \*Papagrigoriou E, Gingras AR, Barsukov IL, Bate N, Fillingham IJ, Patel B, Frank R, Ziegler WH, Roberts GCK, Critchley DR, Emsley J (2004) Activation of a vinculin-binding site in the talin rod involves rearrangement of a five-helix bundle. *EMBO J* 23:2942-2951  
*The first evidence that the vinculin-binding residues of talin are buried in the talin helical bundles, and hence that the bundle must unfold to allow vinculin to bind.*
- Patel B, Gingras AR, Bobkov AA, Fujimoto LM, Zhang M, Liddington RC, Mazzeo D, Emsley J, Roberts GCK, Barsukov IL, Critchley DR (2006) The activity of the vinculin binding sites in talin is influenced by the stability of the helical bundles that make up the talin rod. *J Biol Chem* 281:7458-7467
- Rodius S, Chaloin O, Moes M, Schaffner-Reckinger E, Landrieu I, Lippens G, Lin MH, Zhang J, Kieffer N (2008) The talin rod IBS2  $\alpha$ -helix interacts with the  $\beta$ 3 integrin cytoplasmic tail membrane-proximal helix by establishing charge complementary salt bridges. *J Biol Chem* 283:24212-24223
- Senetar MA, Foster SJ, McCann RO (2004) Intrasteric inhibition mediates the interaction of the I/LWEQ module proteins Talin1, Talin2, Hip1, and Hip12 with actin. *Biochemistry* 43:15418-15428
- Senetar MA, McCann RO (2005) Gene duplication and functional divergence during evolution of the cytoskeletal linker protein talin. *Gene* 362:141-152
- Smith SJ, McCann R (2007) A C-terminal dimerization motif is required for focal adhesion targeting of Talin 1 and the interaction of the Talin 1 I/LWEQ module with F-actin. *Biochemistry* 46:10886-10898
- Sugase K, Dyson, HJ, Wright, PE (2007) Mechanism of coupled folding and binding of an intrinsically disordered protein. *Nature* 447:1021-1023
- \*\*Tadokoro S, Shattil SJ, Eto K, Tai V, Liddington RC, de Pereda JM, Ginsberg MH, Calderwood DA (2003) Talin binding to integrin beta tails: A final common step in integrin activation. *Science* 302:103-106  
*A definitive study showing that talin is required for integrin activation*
- Tremuth L, Kreis S, Melchior C, Hoebeke J, Ronde P, Plancon S, Takeda K, Kieffer N (2004) A fluorescence cell biology approach to map the second integrin-binding site of talin to a 130-amino acid sequence within the rod domain. *J Biol Chem* 279:22258-22266
- Watanabe N, Bodin L, Pandey M, Krause M, Coughlin S, Boussiotis VA, Ginsberg MH, Shattil SJ (2008) Mechanisms and consequences of agonist-induced talin recruitment to platelet integrin  $\alpha$ IIB $\beta$ 3. *J Cell Biol* 181:1211-1222
- Wegener KL, Basran J, Bagshaw CR, Campbell ID, Roberts GCK, Critchley DR, Barsukov IL (2008) Structural basis for the interaction between the cytoplasmic domain of the hyaluronate receptor layilin and the talin F3 subdomain. *J Mol Biol* 382:112-126
- \*\*Wegener KL, Partridge AW, Han J, Pickford AR, Liddington RC, Ginsberg MH, Campbell ID (2007) Structural basis of integrin activation by talin. *Cell* 128:171-182  
*Provides a clear description of the mechanism by which the talin F3 FERM domain binds both the NPxY motif and the membrane proximal helix in the cytoplasmic tails of  $\beta$ -integrins.*

- Winkler J, Lunsdorf H, Jockusch BM (1997) Energy-filtered electron microscopy reveals that talin is a highly flexible protein composed of a series of globular domains. *Eur J Biochem* 243:430-436
- Xing BD, Jedsadayamata A, Lam SCT (2001) Localization of an integrin binding site to the C-terminus of talin. *J Biol Chem* 276:44373-44378
- Zaidel-Bar R, Itzkovitz, S., Ma'ayan, A., Iyengar, R., and Geiger, B. (2007) Functional atlas of the integrin adhesome. *Nature Cell Biol* 9 858-867
- \*Zhang X, Jiang G, Cai Y, Monkley SJ, Critchley DR, Sheetz MP (2008) Talin depletion reveals independence of initial cell spreading from integrin activation and traction. *Nature Cell Biol* 10:1062-1068  
*Uses talin depleted cells to show that talin is not required for initial cell spreading or for Src activation on fibronectin, but is required for integrin activation, the maintenance of cell spreading, FAK signalling, focal adhesion assembly and the exertion of force on the substrate.*
- \*Ziegler WH, Liddington RC, Critchley DR (2006) The structure and regulation of vinculin. *Trends Cell Biol* 16:453-460  
*A concise review of vinculin, including its regulation by 'head-tail' interaction.*
